# Supplementary material
Source: PubMed Central journal article supplement (PMC102559)
Supplement: nar_28_3_728__1.pdf [file nar_28_3_728__1.pdf]

## SUPPLEMENTARY MATERIAL

|                | Twist        | Roll         | Rise         | Tilt         | Slide        | Shift        |
|----------------|--------------|--------------|--------------|--------------|--------------|--------------|
| <b>complex</b> |              |              |              |              |              |              |
| C1-T2          | 35.17 (4.49) | 12.52 (6.70) | 12.52 (6.70) | 9.80 (6.17)  | -0.65 (0.38) | -0.65 (0.38) |
| T2-T3          | 32.11 (3.49) | 2.39 (5.40)  | 2.39 (5.40)  | 2.53 (5.92)  | -0.65 (0.32) | -0.65 (0.32) |
| T3-T4          | 40.56 (3.42) | 3.61 (4.72)  | 3.61 (4.72)  | 6.26 (4.25)  | -0.63 (0.30) | -0.63 (0.30) |
| T4-T5          | 27.54 (3.44) | 3.64 (4.57)  | 3.64 (4.57)  | 6.23 (5.01)  | -0.88 (0.35) | -0.88 (0.35) |
| T5-G6          | 30.80 (4.91) | 12.46 (6.64) | 12.46 (6.64) | -3.24 (6.26) | -1.34 (0.41) | -1.34 (0.41) |
| G6-C7          | 35.04 (4.26) | -1.87 (5.54) | -1.87 (5.54) | 2.39 (5.68)  | -1.29 (0.50) | -1.29 (0.50) |
| C7-A8          | 24.53 (4.29) | 13.29 (8.77) | 13.29 (8.77) | 7.45 (5.63)  | -0.93 (0.35) | -0.93 (0.35) |
| A8-A9          | 31.07 (3.42) | -2.22 (4.25) | -2.22 (4.25) | 6.08 (3.28)  | -0.88 (0.27) | -0.88 (0.27) |
| A9-A10         | 39.82 (2.93) | -6.72 (4.94) | -6.72 (4.94) | -1.95 (3.25) | -0.39 (0.23) | -0.39 (0.23) |
| A10-A11        | 32.65 (3.54) | 1.86 (5.03)  | 1.86 (5.03)  | 2.29 (4.37)  | -1.26 (0.38) | -1.26 (0.38) |
| A11-G12        | 34.92 (4.82) | 1.26 (4.39)  | 1.26 (6.37)  | 1.03 (5.11)  | -1.50 (0.44) | -1.5 (0.44)  |

|             |              |               |             |              |              |              |
|-------------|--------------|---------------|-------------|--------------|--------------|--------------|
| <b>free</b> |              |               |             |              |              |              |
| C1-T2       | 17.99 (7.75) | 20.66 (9.68)  | 4.59 (0.62) | 0.76 (6.89)  | 0.98 (0.42)  | -0.82 (0.88) |
| T2-T3       | 26.63 (4.27) | 13.03 (4.32)  | 3.57 (0.48) | 6.37 (5.34)  | -0.70 (0.31) | 0.76 (0.44)  |
| T3-T4       | 37.33 (4.02) | 6.28 (4.68)   | 3.57 (0.40) | 3.92 (5.24)  | -1.15 (0.39) | 1.13 (0.48)  |
| T4-T5       | 39.41 (3.82) | 3.45 (4.82)   | 3.20 (0.36) | 6.79 (5.38)  | -0.73 (0.31) | 1.54 (0.54)  |
| T5-G6       | 20.65 (4.04) | 14.70 (4.69)  | 3.20 (0.32) | 6.66 (4.49)  | -0.84 (0.34) | 0.40 (0.49)  |
| G6-C7       | 36.57 (3.62) | -12.22 (5.25) | 3.43 (0.27) | -0.08 (4.29) | -0.48 (0.31) | 0.07 (0.47)  |
| C7-A8       | 22.56 (4.26) | 11.57 (6.12)  | 2.88 (0.31) | 12.63 (4.77) | -0.44 (0.34) | -0.32 (0.40) |
| A8-A9       | 40.63 (3.94) | -3.49 (5.96)  | 3.47 (0.22) | -1.25 (3.72) | 0.22 (0.32)  | -0.14 (0.44) |
| A9-A10      | 34.76 (4.40) | 5.54 (4.88)   | 3.51 (0.23) | -0.42 (4.32) | -1.17 (0.39) | 0.63 (0.40)  |
| A10-A11     | 32.47 (4.51) | 3.78 (5.33)   | 3.37 (0.23) | 1.87 (4.60)  | -1.41 (0.40) | 0.64 (0.37)  |
| A11-G12     | 38.14 (4.20) | 5.37 (7.05)   | 3.43 (0.26) | 2.78 (4.48)  | -1.16 (0.46) | 1.51 (0.47)  |

|                | Propeller      | Buckle        | Inclination  | X-disp       |
|----------------|----------------|---------------|--------------|--------------|
| <b>complex</b> |                |               |              |              |
| C1-G24         | -22.71 (7.67)  | 16.64 (9.29)  | 2.29 (3.24)  | -1.65 (0.60) |
| T2-A23         | -21.66 (5.77)  | 14.19 (7.87)  | 2.83 (3.36)  | -1.59 (0.50) |
| T3-A22         | -26.38 (5.60)  | 4.17 (6.43)   | 2.90 (3.17)  | -1.65 (0.44) |
| T4-A21         | -13.55 (5.24)  | -4.34 (6.06)  | 2.86 (3.01)  | -1.51 (0.30) |
| T5-A20         | -10.32 (6.05)  | 2.68 (5.98)   | 0.96 (3.32)  | -1.74 (0.32) |
| G6-C19         | -13.68 (6.94)  | -7.76 (9.06)  | -1.18 (3.67) | -1.53 (0.35) |
| C7-G18         | -3.30 (6.83)   | -10.95 (7.59) | 0.38 (3.91)  | -1.53 (0.41) |
| A8-T17         | -4.66 (5.06)   | 0.17 (5.92)   | 2.23 (3.93)  | -1.91 (0.35) |
| A9-T16         | -13.95 (5.27)  | 4.59 (5.97)   | 3.93 (3.37)  | -1.63 (0.39) |
| A10-T15        | -23.57 (5.20)  | -5.08 (5.76)  | 3.25 (3.33)  | -1.80 (0.60) |
| A11-T14        | -20.44 (6.05)  | -12.51 (6.80) | 3.27 (3.66)  | -1.79 (0.70) |
| G12-C13        | -25.19 (7.62)  | -18.48 (9.20) | 2.94 (3.80)  | -1.80 (0.86) |
| <b>free</b>    |                |               |              |              |
| C1-G24         | -41.71 (13.35) | 33.16 (8.89)  | 7.85 (5.18)  | -1.32 (0.44) |
| T2-A23         | -33.75 (7.12)  | 15.47 (7.64)  | 8.68 (4.31)  | -1.91 (0.37) |
| T3-A22         | -29.38 (6.67)  | 6.94 (7.44)   | 8.00 (3.59)  | -1.88 (0.32) |
| T4-A21         | -28.54 (5.67)  | -7.63 (7.85)  | 6.93 (3.35)  | -1.82 (0.31) |
| T5-A20         | -11.52 (5.95)  | -16.09 (6.48) | 6.08 (2.88)  | -1.49 (0.32) |
| G6-C19         | -3.07 (6.49)   | 1.00 (6.38)   | 2.81 (2.67)  | -1.41 (0.30) |
| C7-G18         | -4.49 (6.12)   | -1.57 (6.41)  | 3.32 (2.60)  | -1.42 (0.32) |
| A8-T17         | -10.21 (5.89)  | 13.55 (6.42)  | 7.49 (2.85)  | -1.58 (0.30) |
| A9-T16         | -27.15 (5.59)  | 6.15 (8.10)   | 8.11 (3.49)  | -1.81 (0.34) |
| A10-T15        | -25.68 (5.22)  | -8.94 (6.77)  | 9.05 (3.77)  | -1.91 (0.34) |
| A11-T14        | -30.16 (6.89)  | -16.01 (6.90) | 10.16 (4.64) | -1.98 (0.39) |
| G12-C13        | -36.63 (10.88) | -32.72 (10.5) | 10.19 (5.78) | -1.44 (0.46) |

|                | Minor<br>grooove<br>width | Minor<br>grooove<br>width |
|----------------|---------------------------|---------------------------|
|                | <b>complex</b>            | <b>free</b>               |
| <b>G24-T5</b>  | 10.44 (0.45)              | 9.85 (0.63)               |
| <b>A23-G6</b>  | 10.72 (0.51)              | 10.10 (0.60)              |
| <b>A22-C7</b>  | 12.95 (0.84)              | 12.36 (1.05)              |
| <b>A21-A8</b>  | 14.06 (0.99)              | 12.42 (0.84)              |
| <b>A20-A9</b>  | 13.81 (1.04)              | 12.55 (0.70)              |
| <b>C19-A10</b> | 13.93 (0.63)              | 12.48 (1.03)              |
| <b>G18-A11</b> | 10.71 (0.55)              | 10.03 (1.00)              |
| <b>T17-G12</b> | 10.47 (0.44)              | 9.91 (1.04)               |
|                | <b>Pucker</b>             | <b>Pucker</b>             |
|                | <b>complex</b>            | <b>free</b>               |
| <b>C1</b>      | 53.31 (17.6)              | 37.54 (50.26)             |
| <b>T2</b>      | 125.9 (16.07)             | 36.71 (9.86)              |
| <b>T3</b>      | 137.1 (12.75)             | 157.58 (7.82)             |
| <b>T4</b>      | 120.21 (17.04)            | 134.51 (9.40)             |
| <b>T5</b>      | 125.29 (10.63)            | 117.38 (25.61)            |
| <b>G6</b>      | 114.97 (27.27)            | 142.69 (8.41)             |
| <b>C7</b>      | 55.15 (37.89)             | 110.45 (17.55)            |
| <b>A8</b>      | 157.35 (17.05)            | 151.34 (10.09)            |
| <b>A9</b>      | 147.38 (8.64)             | 159.57 (14.93)            |
| <b>A10</b>     | 111.29 (23.15)            | 140.08 (15.47)            |
| <b>A11</b>     | 114.79 (13.90)            | 128.41 (16.25)            |
| <b>G12</b>     | 129.19 (28.84)            | 136.36 (9.94)             |

**Figure S1.** Supplementary data on helical parameters for free DNA (free) and 2:1 complex (complex) of H33258 with d(CTTTTGCAAAG)<sub>2</sub>. Mean values are given with one standard deviation in parentheses.
